# Supplementary material for: Indoor Air Quality at Home—An Economic Analysis
Source: MDPI journal article supplement (doi:10.3390/ijerph18041679), 2021-02-09
Supplement: s1 [file s1]

## Article

# Indoor Air Quality at Home – An Economic Analysis

Amy Dymond<sup>1</sup>, Stuart Mealing<sup>1</sup>, Jessica McMaster<sup>1</sup>, Hayden Holmes<sup>1</sup>, Lesley Owen<sup>2\*</sup><sup>1</sup> York Health Economics Consortium, Enterprise House, Innovation Way, University of York, Heslington, York, United Kingdom, YO10 5NQ<sup>2</sup> National Institute for Health and Care Excellence, 10 Spring Gardens, London, United Kingdom, SW1A 2BU

\* Correspondence: amy.dymond@york.ac.uk; Tel.: +44 (0)1904 322789

**Supplementary material****Appendix A: Model Inputs****Table S.1: Dwelling occupancy by tenure (2017)**

| Tenure              | Distribution of dwellings | Number of dwellings                 | Total number of inhabitants |
|---------------------|---------------------------|-------------------------------------|-----------------------------|
| Owner-occupied      | 62.4%                     | 14,809,164                          | 34,061,078                  |
| Private rented      | 20.5%                     | 4,865,190                           | 11,189,937                  |
| Local authority     | 6.8%                      | 1,613,819                           | 3,711,784                   |
| Housing association | 10.3%                     | 2,444,461                           | 5,622,261                   |
| <b>Total</b>        | <b>100%</b>               | <b>23,732,635</b>                   | <b>54,585,061</b>           |
| Tenure              | Non-decent homes          | Usable floor area <90m <sup>2</sup> | Any damp problem            |
| Owner-occupied      | 19.7%                     | 46.7%                               | 2.7%                        |
| Private rented      | 26.8%                     | 75.8%                               | 8.2%                        |
| Local authority     | 12.6%                     | 91.2%                               | 6.0%                        |
| Housing association | 12.6%                     | 88.5%                               | 3.9%                        |

**Table S.2: Health condition related model inputs**

| Condition         | Prevalence  | Source   |
|-------------------|-------------|----------|
| Asthma            | 8.9%        | [10]     |
| COPD              | 2.0%        | [11]     |
| Allergic rhinitis | 10%         | [12]     |
| GAD               | 4.4%        | [13]     |
| Condition         | Annual cost | Source   |
| Asthma            | £672        | [14, 15] |
| COPD              | £1,382      | [16]     |
| Allergic rhinitis | £373        | [17]     |
| GAD               | £911        | [13]     |

Abbreviations: COPD, continuous obstructive pulmonary disease; GAD, generalized anxiety disorder

**Table S.3: Cost inputs (asthma and COPD)**

| Health state (asthma)   | Unit costs (weekly) | Exacerbations | Duration of exacerbation (week)        | Weeks spent in health state        | Source   |
|-------------------------|---------------------|---------------|----------------------------------------|------------------------------------|----------|
| Controlled              | £12.23              | N/A           | N/A                                    | 51.38                              | [14, 15] |
| Uncontrolled            | £46.61              | N/A           | N/A                                    | 0.50                               |          |
| Moderate exacerbation   | £72.57              | 0.10          | 1                                      | 0.10                               |          |
| Severe exacerbation     | £669.95             | 0.01          | 2                                      | 0.02                               |          |
| Disease severity (COPD) | Prevalence          | Monthly cost  | Non-severe exacerbation rate (monthly) | Severe exacerbation rate (monthly) | Source   |
| Mild                    | 17.1%               | £43.15        | 0.05                                   | 0.01                               | [16, 18] |
| Moderate                | 52.2%               | £43.15        | 0.05                                   | 0.01                               |          |
| Severe                  | 25.5%               | £90.55        | 0.06                                   | 0.02                               |          |
| Very severe             | 5.2%                | £149.53       | 0.07                                   | 0.03                               |          |

The weekly cost of asthma was sourced from a NICE technology appraisal for eosinophilic asthma (TA479) [14]. No data were identified on the number of weeks per year an individual with asthma will spend with symptoms of varying severity. The duration of asthma of a severe or moderate exacerbation was sourced from TA479. The average annual number of exacerbations an individual with asthma will have (0.11) was sourced from a retrospective cohort study describing asthma exacerbation frequency and risk [15]. However, this study did not inform the distributional split of these exacerbations between moderate or severe. Therefore, it was assumed that the majority of exacerbations would be moderate (0.1) and only a small proportion severe (0.01). It was assumed that patients would spend 0.5 weeks a year with uncontrolled asthma and would have controlled asthma for the remainder of the year. The number of weeks spent in each health state, per year, was multiplied by the weekly unit cost to generate an annual unit cost per person with asthma of £672 (Table A1).

The proportion of people with COPD at each level of disease severity was sourced from a study informed by a large database of primary care COPD patients in the UK [19]. The monthly costs associated with the treatment of severe and non-severe exacerbations were £4,071 and £129 respectively. These costs were extracted from a cost-utility study of COPD in the UK [16], and were

multiplied by 12 to generate annual costs. A weighted average of these costs, based on the distribution of severity across patients with COPD, was calculated to generate an annual unit cost per person of £1,382 (Table A1). Due to a lack of alternative information, it was assumed that the monthly cost would be equivalent for people with mild and moderate COPD. Similarly, the non-severe and severe exacerbation rates were assumed to be equivalent between those with mild and moderate COPD.

**Table S.3: Derivation of five-year discount rate**

|                | <b>Year 1</b> | <b>Year 2</b> | <b>Year 3</b> | <b>Year 4</b> | <b>Year 5</b> | <b>Total</b>   |
|----------------|---------------|---------------|---------------|---------------|---------------|----------------|
| No discounting | 1.00000       | 1.00000       | 1.00000       | 1.00000       | 1.00000       | <b>5.00000</b> |
| Discounting    | 1.00000       | 0.96618       | 0.93351       | 0.90194       | 0.87144       | <b>4.67308</b> |
| <b>Ratio</b>   |               |               |               |               |               | <b>0.93462</b> |

## Appendix B: Two-way sensitivity analysis

### Asthma

|                                                                      |     | Upfront cost of intervention (per dwelling) |             |             |             |              |              |              |              |              |              |              |
|----------------------------------------------------------------------|-----|---------------------------------------------|-------------|-------------|-------------|--------------|--------------|--------------|--------------|--------------|--------------|--------------|
|                                                                      |     | £0.00                                       | £25.00      | £50.00      | £75.00      | £100.00      | £125.00      | £150.00      | £175.00      | £200.00      | £225.00      | £250.00      |
| Relative reduction in asthma associated symptoms due to intervention | 0%  | £0                                          | £29,578,873 | £59,157,746 | £88,736,619 | £118,315,492 | £147,894,365 | £177,473,238 | £207,052,111 | £236,630,984 | £266,209,857 | £295,788,730 |
|                                                                      | 1%  | £11,851,703                                 | £17,727,170 | £47,306,043 | £76,884,916 | £106,463,789 | £136,042,662 | £165,621,535 | £195,200,408 | £224,779,281 | £254,358,154 | £283,937,027 |
|                                                                      | 2%  | £23,703,406                                 | £5,875,467  | £35,454,340 | £65,033,212 | £94,612,085  | £124,190,958 | £153,769,831 | £183,348,704 | £212,927,577 | £242,506,450 | £272,085,323 |
|                                                                      | 3%  | £35,555,110                                 | £5,976,237  | £23,602,636 | £53,181,509 | £82,760,382  | £112,339,255 | £141,918,128 | £171,497,001 | £201,075,874 | £230,654,747 | £260,233,620 |
|                                                                      | 4%  | £47,406,813                                 | £17,827,940 | £11,750,933 | £41,329,806 | £70,908,679  | £100,487,552 | £130,066,425 | £159,645,298 | £189,224,171 | £218,803,044 | £248,381,917 |
|                                                                      | 5%  | £59,258,516                                 | £29,679,643 | £100,770    | £29,478,103 | £59,056,976  | £88,635,849  | £118,214,722 | £147,793,595 | £177,372,468 | £206,951,341 | £236,530,214 |
|                                                                      | 6%  | £71,110,219                                 | £41,531,346 | £11,952,473 | £17,626,400 | £47,205,273  | £76,784,146  | £106,363,019 | £135,941,892 | £165,520,765 | £195,099,637 | £224,678,510 |
|                                                                      | 7%  | £82,961,922                                 | £53,383,050 | £23,804,177 | £5,774,696  | £35,353,569  | £64,932,442  | £94,511,315  | £124,090,188 | £153,669,061 | £183,247,934 | £212,826,807 |
|                                                                      | 8%  | £94,813,626                                 | £65,234,753 | £35,655,880 | £6,077,007  | £23,501,866  | £53,080,739  | £82,659,612  | £112,238,485 | £141,817,358 | £171,396,231 | £200,975,104 |
|                                                                      | 9%  | £106,665,329                                | £77,086,456 | £47,507,583 | £17,928,710 | £11,650,163  | £41,229,036  | £70,807,909  | £100,386,782 | £129,965,655 | £159,544,528 | £189,123,401 |
|                                                                      | 10% | £118,517,032                                | £88,938,159 | £59,359,286 | £29,780,413 | £201,540     | £29,377,333  | £58,956,206  | £88,535,079  | £118,113,952 | £147,692,825 | £177,271,698 |

Figure S.1: Incremental total cost varying the effectiveness and cost of the intervention across England over five years; low risk; 50% implementation rate; non-decent homes (asthma)

|                                                                      |     | Upfront cost of intervention (per dwelling) |              |              |              |              |              |              |              |              |              |              |
|----------------------------------------------------------------------|-----|---------------------------------------------|--------------|--------------|--------------|--------------|--------------|--------------|--------------|--------------|--------------|--------------|
|                                                                      |     | £0.00                                       | £25.00       | £50.00       | £75.00       | £100.00      | £125.00      | £150.00      | £175.00      | £200.00      | £225.00      | £250.00      |
| Relative reduction in asthma associated symptoms due to intervention | 0%  | £0                                          | £88,992,783  | £177,985,566 | £266,978,349 | £355,971,132 | £444,963,915 | £533,956,698 | £622,949,481 | £711,942,264 | £800,935,047 | £889,927,831 |
|                                                                      | 1%  | £35,657,750                                 | £53,335,033  | £142,327,816 | £231,320,599 | £320,313,382 | £409,306,165 | £498,298,948 | £587,291,732 | £676,284,515 | £765,277,298 | £854,270,081 |
|                                                                      | 2%  | £71,315,500                                 | £17,677,283  | £106,670,066 | £195,662,849 | £284,655,633 | £373,648,416 | £462,641,199 | £551,633,982 | £640,626,765 | £729,619,548 | £818,612,331 |
|                                                                      | 3%  | £106,973,250                                | £17,980,466  | £71,012,317  | £160,005,100 | £248,997,883 | £337,990,666 | £426,983,449 | £515,976,232 | £604,969,015 | £693,961,798 | £782,954,581 |
|                                                                      | 4%  | £142,630,999                                | £53,638,216  | £35,354,567  | £124,347,350 | £213,340,133 | £302,332,916 | £391,325,699 | £480,318,482 | £569,311,265 | £658,304,048 | £747,296,831 |
|                                                                      | 5%  | £178,288,749                                | £89,295,966  | £303,183     | £88,689,600  | £177,682,383 | £266,675,166 | £355,667,949 | £444,660,732 | £533,653,515 | £622,646,298 | £711,639,081 |
|                                                                      | 6%  | £213,946,499                                | £124,953,716 | £35,960,933  | £53,031,850  | £142,024,633 | £231,017,416 | £320,010,199 | £409,002,982 | £497,995,765 | £586,988,548 | £675,981,332 |
|                                                                      | 7%  | £249,604,249                                | £160,611,466 | £71,618,683  | £17,374,100  | £106,366,883 | £195,359,666 | £284,352,449 | £373,345,233 | £462,338,016 | £551,330,799 | £640,323,582 |
|                                                                      | 8%  | £285,261,999                                | £196,269,216 | £107,276,433 | £18,283,650  | £70,709,134  | £159,701,917 | £248,694,700 | £337,687,483 | £426,680,266 | £515,673,049 | £604,665,832 |
|                                                                      | 9%  | £320,919,749                                | £231,926,965 | £142,934,182 | £53,941,399  | £35,051,384  | £124,044,167 | £213,036,950 | £302,029,733 | £391,022,516 | £480,015,299 | £569,008,082 |
|                                                                      | 10% | £356,577,498                                | £267,584,715 | £178,591,932 | £89,599,149  | £606,366     | £88,386,417  | £177,379,200 | £266,371,983 | £355,364,766 | £444,357,549 | £533,350,332 |

Figure S.2: Incremental total cost varying the effectiveness and cost of the intervention across England over five years; low risk; 50% implementation rate; usable floor area <90m<sup>2</sup> (asthma)

|                                                                      |     | Upfront cost of intervention (per dwelling) |             |             |             |             |             |             |             |             |             |             |
|----------------------------------------------------------------------|-----|---------------------------------------------|-------------|-------------|-------------|-------------|-------------|-------------|-------------|-------------|-------------|-------------|
|                                                                      |     | £0.00                                       | £25.00      | £50.00      | £75.00      | £100.00     | £125.00     | £150.00     | £175.00     | £200.00     | £225.00     | £250.00     |
| Relative reduction in asthma associated symptoms due to intervention | 0%  | £0                                          | £6,193,476  | £12,386,952 | £18,580,428 | £24,773,904 | £30,967,380 | £37,160,857 | £43,354,333 | £49,547,809 | £55,741,285 | £61,934,761 |
|                                                                      | 1%  | £2,481,610                                  | £3,711,866  | £9,905,342  | £16,098,818 | £22,292,294 | £28,485,770 | £34,679,246 | £40,872,722 | £47,066,198 | £53,259,674 | £59,453,150 |
|                                                                      | 2%  | £4,963,221                                  | £1,230,255  | £7,423,731  | £13,617,207 | £19,810,683 | £26,004,160 | £32,197,636 | £38,391,112 | £44,584,588 | £50,778,064 | £56,971,540 |
|                                                                      | 3%  | £7,444,831                                  | £1,251,355  | £4,942,121  | £11,135,597 | £17,329,073 | £23,522,549 | £29,716,025 | £35,909,501 | £42,102,977 | £48,296,453 | £54,489,930 |
|                                                                      | 4%  | £9,926,442                                  | £3,732,966  | £2,460,510  | £8,653,986  | £14,847,463 | £21,040,939 | £27,234,415 | £33,427,891 | £39,621,367 | £45,814,843 | £52,008,319 |
|                                                                      | 5%  | £12,408,052                                 | £6,214,576  | £21,100     | £6,172,376  | £12,365,852 | £18,559,328 | £24,752,804 | £30,946,280 | £37,139,756 | £43,333,233 | £49,526,709 |
|                                                                      | 6%  | £14,889,663                                 | £8,696,187  | £2,502,711  | £3,690,766  | £9,884,242  | £16,077,718 | £22,271,194 | £28,464,670 | £34,658,146 | £40,851,622 | £47,045,098 |
|                                                                      | 7%  | £17,371,273                                 | £11,177,797 | £4,984,321  | £1,209,155  | £7,402,631  | £13,596,107 | £19,789,583 | £25,983,059 | £32,176,536 | £38,370,012 | £44,563,488 |
|                                                                      | 8%  | £19,852,884                                 | £13,659,408 | £7,465,931  | £1,272,455  | £4,921,021  | £11,114,497 | £17,307,973 | £23,501,449 | £29,694,925 | £35,888,401 | £42,081,877 |
|                                                                      | 9%  | £22,334,494                                 | £16,141,018 | £9,947,542  | £3,754,066  | £2,439,410  | £8,632,886  | £14,826,362 | £21,019,839 | £27,213,315 | £33,406,791 | £39,600,267 |
|                                                                      | 10% | £24,816,105                                 | £18,622,628 | £12,429,152 | £6,235,676  | £42,200     | £6,151,276  | £12,344,752 | £18,538,228 | £24,731,704 | £30,925,180 | £37,118,656 |

Figure S.3: Incremental total cost varying the effectiveness and cost of the intervention across England over five years; low risk; 50% implementation rate; any damp problem (asthma)

## COPD

|                                                                                                     |     | Upfront cost of intervention (per dwelling) |             |             |             |             |             |             |             |             |             |             |
|-----------------------------------------------------------------------------------------------------|-----|---------------------------------------------|-------------|-------------|-------------|-------------|-------------|-------------|-------------|-------------|-------------|-------------|
|                                                                                                     |     | £0.00                                       | £25.00      | £50.00      | £75.00      | £100.00     | £125.00     | £150.00     | £175.00     | £200.00     | £225.00     | £250.00     |
| Relative reduction in chronic obstructive pulmonary disease associated symptoms due to intervention | 0%  | £0                                          | £3,549,465  | £7,098,930  | £10,648,394 | £14,197,859 | £17,747,324 | £21,296,789 | £24,846,253 | £28,395,718 | £31,945,183 | £35,494,648 |
|                                                                                                     | 1%  | £2,134,992                                  | £1,414,472  | £4,963,937  | £8,513,402  | £12,062,867 | £15,612,331 | £19,161,796 | £22,711,261 | £26,260,726 | £29,810,190 | £33,359,655 |
|                                                                                                     | 2%  | £4,269,985                                  | £720,520    | £2,828,945  | £6,378,409  | £9,927,874  | £13,477,339 | £17,026,804 | £20,576,268 | £24,125,733 | £27,675,198 | £31,224,663 |
|                                                                                                     | 3%  | £6,404,977                                  | £2,855,513  | £693,952    | £4,243,417  | £7,792,882  | £11,342,346 | £14,891,811 | £18,441,276 | £21,990,741 | £25,540,205 | £29,089,670 |
|                                                                                                     | 4%  | £8,539,970                                  | £4,990,505  | £1,441,040  | £2,108,424  | £5,657,889  | £9,207,354  | £12,756,819 | £16,306,283 | £19,855,748 | £23,405,213 | £26,954,678 |
|                                                                                                     | 5%  | £10,674,962                                 | £7,125,498  | £3,576,033  | £26,568     | £3,522,897  | £7,072,361  | £10,621,826 | £14,171,291 | £17,720,756 | £21,270,220 | £24,819,685 |
|                                                                                                     | 6%  | £12,809,955                                 | £9,260,490  | £5,711,025  | £2,161,561  | £1,387,904  | £4,937,369  | £8,486,834  | £12,036,298 | £15,585,763 | £19,135,228 | £22,684,693 |
|                                                                                                     | 7%  | £14,944,947                                 | £11,395,483 | £7,846,018  | £4,296,553  | £747,088    | £2,802,376  | £6,351,841  | £9,901,306  | £13,450,771 | £17,000,236 | £20,549,700 |
|                                                                                                     | 8%  | £17,079,940                                 | £13,530,475 | £9,981,010  | £6,431,546  | £2,882,081  | £667,384    | £4,216,849  | £7,766,314  | £11,315,778 | £14,865,243 | £18,414,708 |
|                                                                                                     | 9%  | £19,214,932                                 | £15,665,468 | £12,116,003 | £8,566,538  | £5,017,073  | £1,467,608  | £2,081,856  | £5,631,321  | £9,180,786  | £12,730,251 | £16,279,715 |
|                                                                                                     | 10% | £21,349,925                                 | £17,800,460 | £14,250,995 | £10,701,530 | £7,152,066  | £3,602,601  | £53,136     | £3,496,329  | £7,045,793  | £10,595,258 | £14,144,723 |

Figure S.4: Incremental total cost varying the effectiveness and cost of the intervention across England over five years; extreme risk; 100% implementation rate; non-decent homes (COPD)



|                                                                                                     |     | Upfront cost of intervention (per dwelling) |             |             |             |             |             |             |             |             |             |              |
|-----------------------------------------------------------------------------------------------------|-----|---------------------------------------------|-------------|-------------|-------------|-------------|-------------|-------------|-------------|-------------|-------------|--------------|
|                                                                                                     |     | £0.00                                       | £25.00      | £50.00      | £75.00      | £100.00     | £125.00     | £150.00     | £175.00     | £200.00     | £225.00     | £250.00      |
| Relative reduction in chronic obstructive pulmonary disease associated symptoms due to intervention | 0%  | £0                                          | £10,679,134 | £21,358,268 | £32,037,402 | £42,716,536 | £53,395,670 | £64,074,804 | £74,753,938 | £85,433,072 | £96,112,206 | £106,791,340 |
|                                                                                                     | 1%  | £6,423,467                                  | £4,255,667  | £14,934,801 | £25,613,935 | £36,293,069 | £46,972,203 | £57,651,337 | £68,330,471 | £79,009,604 | £89,688,738 | £100,367,872 |
|                                                                                                     | 2%  | £12,846,935                                 | £2,167,801  | £8,511,333  | £19,190,467 | £29,869,601 | £40,548,735 | £51,227,869 | £61,907,003 | £72,586,137 | £83,265,271 | £93,944,405  |
|                                                                                                     | 3%  | £19,270,402                                 | £8,591,268  | £2,087,866  | £12,767,000 | £23,446,134 | £34,125,268 | £44,804,402 | £55,483,536 | £66,162,670 | £76,841,804 | £87,520,938  |
|                                                                                                     | 4%  | £25,693,869                                 | £15,014,735 | £4,335,601  | £6,343,533  | £17,022,667 | £27,701,801 | £38,380,935 | £49,060,069 | £59,739,203 | £70,418,337 | £81,097,471  |
|                                                                                                     | 5%  | £32,117,336                                 | £21,438,202 | £10,759,068 | £79,934     | £10,599,200 | £21,278,334 | £31,957,468 | £42,636,601 | £53,315,735 | £63,994,869 | £74,674,003  |
|                                                                                                     | 6%  | £38,540,804                                 | £27,861,670 | £17,182,536 | £6,503,402  | £4,175,732  | £14,854,866 | £25,534,000 | £36,213,134 | £46,892,268 | £57,571,402 | £68,250,536  |
|                                                                                                     | 7%  | £44,964,271                                 | £34,285,137 | £23,606,003 | £12,926,869 | £2,247,735  | £8,431,399  | £19,110,533 | £29,789,667 | £40,468,801 | £51,147,935 | £61,827,069  |
|                                                                                                     | 8%  | £51,387,738                                 | £40,708,604 | £30,029,470 | £19,350,336 | £8,671,202  | £2,007,932  | £12,687,066 | £23,366,200 | £34,045,334 | £44,724,468 | £55,403,602  |
|                                                                                                     | 9%  | £57,811,205                                 | £47,132,071 | £36,452,937 | £25,773,803 | £15,094,669 | £4,415,535  | £6,263,599  | £16,942,732 | £27,621,866 | £38,301,000 | £48,980,134  |
|                                                                                                     | 10% | £64,234,673                                 | £53,555,539 | £42,876,405 | £32,197,271 | £21,518,137 | £10,839,003 | £159,869    | £10,519,265 | £21,198,399 | £31,877,533 | £42,556,667  |

Figure S.5: Incremental total cost varying the effectiveness and cost of the intervention across England over five years; extreme risk; 100% implementation rate; usable floor area <90m<sup>2</sup> (COPD)

|                                                                                                     |     | Upfront cost of intervention (per dwelling) |            |            |            |            |            |            |            |            |            |            |
|-----------------------------------------------------------------------------------------------------|-----|---------------------------------------------|------------|------------|------------|------------|------------|------------|------------|------------|------------|------------|
|                                                                                                     |     | £0.00                                       | £25.00     | £50.00     | £75.00     | £100.00    | £125.00    | £150.00    | £175.00    | £200.00    | £225.00    | £250.00    |
| Relative reduction in chronic obstructive pulmonary disease associated symptoms due to intervention | 0%  | £0                                          | £743,217   | £1,486,434 | £2,229,651 | £2,972,869 | £3,716,086 | £4,459,303 | £5,202,520 | £5,945,737 | £6,688,954 | £7,432,171 |
|                                                                                                     | 1%  | £447,043                                    | £296,174   | £1,039,391 | £1,782,609 | £2,525,826 | £3,269,043 | £4,012,260 | £4,755,477 | £5,498,694 | £6,241,911 | £6,985,128 |
|                                                                                                     | 2%  | £894,086                                    | £150,869   | £592,348   | £1,335,566 | £2,078,783 | £2,822,000 | £3,565,217 | £4,308,434 | £5,051,651 | £5,794,868 | £6,538,086 |
|                                                                                                     | 3%  | £1,341,129                                  | £597,912   | £145,306   | £888,523   | £1,631,740 | £2,374,957 | £3,118,174 | £3,861,391 | £4,604,608 | £5,347,826 | £6,091,043 |
|                                                                                                     | 4%  | £1,788,172                                  | £1,044,954 | £301,737   | £441,480   | £1,184,697 | £1,927,914 | £2,671,131 | £3,414,348 | £4,157,565 | £4,900,783 | £5,644,000 |
|                                                                                                     | 5%  | £2,235,214                                  | £1,491,997 | £748,780   | £5,563     | £737,654   | £1,480,871 | £2,224,088 | £2,967,305 | £3,710,523 | £4,453,740 | £5,196,957 |
|                                                                                                     | 6%  | £2,682,257                                  | £1,939,040 | £1,195,823 | £452,606   | £290,611   | £1,033,828 | £1,777,045 | £2,520,263 | £3,263,480 | £4,006,697 | £4,749,914 |
|                                                                                                     | 7%  | £3,129,300                                  | £2,386,083 | £1,642,866 | £899,649   | £156,432   | £586,785   | £1,330,003 | £2,073,220 | £2,816,437 | £3,559,654 | £4,302,871 |
|                                                                                                     | 8%  | £3,576,343                                  | £2,833,126 | £2,089,909 | £1,346,692 | £603,475   | £139,743   | £882,960   | £1,626,177 | £2,369,394 | £3,112,611 | £3,855,828 |
|                                                                                                     | 9%  | £4,023,386                                  | £3,280,169 | £2,536,952 | £1,793,735 | £1,050,517 | £307,300   | £435,917   | £1,179,134 | £1,922,351 | £2,665,568 | £3,408,785 |
|                                                                                                     | 10% | £4,470,429                                  | £3,727,212 | £2,983,995 | £2,240,777 | £1,497,560 | £754,343   | £11,126    | £732,091   | £1,475,308 | £2,218,525 | £2,961,742 |

Figure S.61: Incremental total cost varying the effectiveness and cost of the intervention across England over five years; extreme risk; 100% implementation rate; any damp problem (COPD)

|                                                                                                     |     | Upfront cost of intervention (per dwelling) |             |             |             |              |              |              |              |              |              |              |
|-----------------------------------------------------------------------------------------------------|-----|---------------------------------------------|-------------|-------------|-------------|--------------|--------------|--------------|--------------|--------------|--------------|--------------|
|                                                                                                     |     | £0.00                                       | £25.00      | £50.00      | £75.00      | £100.00      | £125.00      | £150.00      | £175.00      | £200.00      | £225.00      | £250.00      |
| Relative reduction in chronic obstructive pulmonary disease associated symptoms due to intervention | 0%  | £0                                          | £29,578,873 | £59,157,746 | £88,736,619 | £118,315,492 | £147,894,365 | £177,473,238 | £207,052,111 | £236,630,984 | £266,209,857 | £295,788,730 |
|                                                                                                     | 1%  | £5,491,236                                  | £24,087,637 | £53,666,510 | £83,245,383 | £112,824,256 | £142,403,129 | £171,982,002 | £201,560,875 | £231,139,748 | £260,718,621 | £290,297,494 |
|                                                                                                     | 2%  | £10,982,472                                 | £18,596,401 | £48,175,274 | £77,754,147 | £107,333,020 | £136,911,893 | £166,490,766 | £196,069,639 | £225,648,512 | £255,227,385 | £284,806,258 |
|                                                                                                     | 3%  | £16,473,707                                 | £13,105,166 | £42,684,039 | £72,262,912 | £101,841,785 | £131,420,658 | £160,999,530 | £190,578,403 | £220,157,276 | £249,736,149 | £279,315,022 |
|                                                                                                     | 4%  | £21,964,943                                 | £7,613,930  | £37,192,803 | £66,771,676 | £96,350,549  | £125,929,422 | £155,508,295 | £185,087,168 | £214,666,041 | £244,244,914 | £273,823,787 |
|                                                                                                     | 5%  | £27,456,179                                 | £2,122,694  | £31,701,567 | £61,280,440 | £90,859,313  | £120,438,186 | £150,017,059 | £179,595,932 | £209,174,805 | £238,753,678 | £268,332,551 |
|                                                                                                     | 6%  | £32,947,415                                 | £3,368,542  | £26,210,331 | £55,789,204 | £85,368,077  | £114,946,950 | £144,525,823 | £174,104,696 | £203,683,569 | £233,262,442 | £262,841,315 |
|                                                                                                     | 7%  | £38,438,650                                 | £8,859,778  | £20,719,095 | £50,297,968 | £79,876,841  | £109,455,714 | £139,034,587 | £168,613,460 | £198,192,333 | £227,771,206 | £257,350,079 |
|                                                                                                     | 8%  | £43,929,886                                 | £14,351,013 | £15,227,860 | £44,806,733 | £74,385,606  | £103,964,479 | £133,543,352 | £163,122,225 | £192,701,098 | £222,279,970 | £251,858,843 |
|                                                                                                     | 9%  | £49,421,122                                 | £19,842,249 | £9,736,624  | £39,315,497 | £68,894,370  | £98,473,243  | £128,052,116 | £157,630,989 | £187,209,862 | £216,788,735 | £246,367,608 |
|                                                                                                     | 10% | £54,912,358                                 | £25,333,485 | £4,245,388  | £33,824,261 | £63,403,134  | £92,982,007  | £122,560,880 | £152,139,753 | £181,718,626 | £211,297,499 | £240,876,372 |

Figure S.7: Incremental total cost varying the effectiveness and cost of the intervention across England over five years; low risk; 50% implementation rate; non-decent homes (COPD)

|                                                                                                     |     | Upfront cost of intervention (per dwelling) |             |              |              |              |              |              |              |              |              |              |
|-----------------------------------------------------------------------------------------------------|-----|---------------------------------------------|-------------|--------------|--------------|--------------|--------------|--------------|--------------|--------------|--------------|--------------|
|                                                                                                     |     | £0.00                                       | £25.00      | £50.00       | £75.00       | £100.00      | £125.00      | £150.00      | £175.00      | £200.00      | £225.00      | £250.00      |
| Relative reduction in chronic obstructive pulmonary disease associated symptoms due to intervention | 0%  | £0                                          | £88,992,783 | £177,985,566 | £266,978,349 | £355,971,132 | £444,963,915 | £533,956,698 | £622,949,481 | £711,942,264 | £800,935,047 | £889,927,831 |
|                                                                                                     | 1%  | £16,521,264                                 | £72,471,520 | £161,464,303 | £250,457,086 | £339,449,869 | £428,442,652 | £517,435,435 | £606,428,218 | £695,421,001 | £784,413,784 | £873,406,567 |
|                                                                                                     | 2%  | £33,042,527                                 | £55,950,256 | £144,943,039 | £233,935,822 | £322,928,605 | £411,921,388 | £500,914,171 | £589,906,954 | £678,899,737 | £767,892,520 | £856,885,303 |
|                                                                                                     | 3%  | £49,563,791                                 | £39,428,993 | £128,421,776 | £217,414,559 | £306,407,342 | £395,400,125 | £484,392,908 | £573,385,691 | £662,378,474 | £751,371,257 | £840,364,040 |
|                                                                                                     | 4%  | £66,085,054                                 | £22,907,729 | £111,900,512 | £200,893,295 | £289,886,078 | £378,878,861 | £467,871,644 | £556,864,427 | £645,857,210 | £734,849,993 | £823,842,776 |
|                                                                                                     | 5%  | £82,606,318                                 | £6,386,465  | £95,379,249  | £184,372,032 | £273,364,815 | £362,357,598 | £451,350,381 | £540,343,164 | £629,335,947 | £718,328,730 | £807,321,513 |
|                                                                                                     | 6%  | £99,127,581                                 | £10,134,798 | £78,857,985  | £167,850,768 | £256,843,551 | £345,836,334 | £434,829,117 | £523,821,900 | £612,814,683 | £701,807,466 | £790,800,249 |
|                                                                                                     | 7%  | £115,648,845                                | £26,656,062 | £62,336,722  | £151,329,505 | £240,322,288 | £329,315,071 | £418,307,854 | £507,300,637 | £596,293,420 | £685,286,203 | £774,278,986 |
|                                                                                                     | 8%  | £132,170,108                                | £43,177,325 | £45,815,458  | £134,808,241 | £223,801,024 | £312,793,807 | £401,786,590 | £490,779,373 | £579,772,156 | £668,764,939 | £757,757,722 |
|                                                                                                     | 9%  | £148,691,372                                | £59,698,589 | £29,294,194  | £118,286,978 | £207,279,761 | £296,272,544 | £385,265,327 | £474,258,110 | £563,250,893 | £652,243,676 | £741,236,459 |
|                                                                                                     | 10% | £165,212,635                                | £76,219,852 | £12,772,931  | £101,765,714 | £190,758,497 | £279,751,280 | £368,744,063 | £457,736,846 | £546,729,629 | £635,722,412 | £724,715,195 |

Figure S.82: Incremental total cost varying the effectiveness and cost of the intervention across England over five years; low risk; 50% implementation rate; usable floor area <90m<sup>2</sup> (COPD)



|                                                                                                     |     | Upfront cost of intervention (per dwelling) |             |             |             |             |             |             |             |             |             |             |
|-----------------------------------------------------------------------------------------------------|-----|---------------------------------------------|-------------|-------------|-------------|-------------|-------------|-------------|-------------|-------------|-------------|-------------|
|                                                                                                     |     | £0.00                                       | £25.00      | £50.00      | £75.00      | £100.00     | £125.00     | £150.00     | £175.00     | £200.00     | £225.00     | £250.00     |
| Relative reduction in chronic obstructive pulmonary disease associated symptoms due to intervention | 0%  | £0                                          | £6,193,476  | £12,386,952 | £18,580,428 | £24,773,904 | £30,967,380 | £37,160,857 | £43,354,333 | £49,547,809 | £55,741,285 | £61,934,761 |
|                                                                                                     | 1%  | £-1,149,802                                 | £5,043,674  | £11,237,151 | £17,430,627 | £23,624,103 | £29,817,579 | £36,011,055 | £42,204,531 | £48,398,007 | £54,591,483 | £60,784,959 |
|                                                                                                     | 2%  | £-2,299,603                                 | £3,893,873  | £10,087,349 | £16,280,825 | £22,474,301 | £28,667,777 | £34,861,253 | £41,054,729 | £47,248,205 | £53,441,681 | £59,635,158 |
|                                                                                                     | 3%  | £-3,449,405                                 | £2,744,071  | £8,937,547  | £15,131,023 | £21,324,499 | £27,517,975 | £33,711,452 | £39,904,928 | £46,098,404 | £52,291,880 | £58,485,356 |
|                                                                                                     | 4%  | £-4,599,207                                 | £1,594,269  | £7,787,746  | £13,981,222 | £20,174,698 | £26,368,174 | £32,561,650 | £38,755,126 | £44,948,602 | £51,142,078 | £57,335,554 |
|                                                                                                     | 5%  | £-5,749,008                                 | £444,468    | £6,637,944  | £12,831,420 | £19,024,896 | £25,218,372 | £31,411,848 | £37,605,324 | £43,798,800 | £49,992,276 | £56,185,753 |
|                                                                                                     | 6%  | £-6,898,810                                 | £-705,334   | £5,488,142  | £11,681,618 | £17,875,094 | £24,068,570 | £30,262,047 | £36,455,523 | £42,648,999 | £48,842,475 | £55,035,951 |
|                                                                                                     | 7%  | £-8,048,612                                 | £-1,855,136 | £4,338,340  | £10,531,817 | £16,725,293 | £22,918,769 | £29,112,245 | £35,305,721 | £41,499,197 | £47,692,673 | £53,886,149 |
|                                                                                                     | 8%  | £-9,198,413                                 | £-3,004,937 | £3,188,539  | £9,382,015  | £15,575,491 | £21,768,967 | £27,962,443 | £34,155,919 | £40,349,395 | £46,542,871 | £52,736,348 |
|                                                                                                     | 9%  | £-10,348,215                                | £-4,154,739 | £2,038,737  | £8,232,213  | £14,425,689 | £20,619,165 | £26,812,642 | £33,006,118 | £39,199,594 | £45,393,070 | £51,586,546 |
|                                                                                                     | 10% | £-11,498,017                                | £-5,304,541 | £888,935    | £7,082,412  | £13,275,888 | £19,469,364 | £25,662,840 | £31,856,316 | £38,049,792 | £44,243,268 | £50,436,744 |

Figure S.93: Incremental total cost varying the effectiveness and cost of the intervention across England over five years; low risk; 50% implementation rate; any damp problem (COPD)

## Allergic rhinitis

|                                                                                 |     | Upfront cost of intervention (per dwelling) |              |              |              |              |              |             |             |             |             |             |
|---------------------------------------------------------------------------------|-----|---------------------------------------------|--------------|--------------|--------------|--------------|--------------|-------------|-------------|-------------|-------------|-------------|
|                                                                                 |     | £0.00                                       | £25.00       | £50.00       | £75.00       | £100.00      | £125.00      | £150.00     | £175.00     | £200.00     | £225.00     | £250.00     |
| Relative reduction in allergic rhinitis associated symptoms due to intervention | 0%  | £0                                          | £3,549,465   | £7,098,930   | £10,648,394  | £14,197,859  | £17,747,324  | £21,296,789 | £24,846,253 | £28,395,718 | £31,945,183 | £35,494,648 |
|                                                                                 | 1%  | £-2,879,719                                 | £669,746     | £4,219,210   | £7,768,675   | £11,318,140  | £14,867,605  | £18,417,069 | £21,966,534 | £25,515,999 | £29,065,464 | £32,614,928 |
|                                                                                 | 2%  | £-5,759,438                                 | £-2,209,974  | £1,339,491   | £4,888,956   | £8,438,421   | £11,987,885  | £15,537,350 | £19,086,815 | £22,636,280 | £26,185,744 | £29,735,209 |
|                                                                                 | 3%  | £-8,639,158                                 | £-5,089,693  | £-1,540,228  | £2,009,237   | £5,558,701   | £9,108,166   | £12,657,631 | £16,207,096 | £19,756,560 | £23,306,025 | £26,855,490 |
|                                                                                 | 4%  | £-11,518,877                                | £-7,969,412  | £-4,419,947  | £-870,483    | £2,678,982   | £6,228,447   | £9,777,912  | £13,327,376 | £16,876,841 | £20,426,306 | £23,975,771 |
|                                                                                 | 5%  | £-14,398,596                                | £-10,849,131 | £-7,299,667  | £-3,750,202  | £-200,737    | £3,348,728   | £6,898,192  | £10,447,657 | £13,997,122 | £17,546,587 | £21,096,051 |
|                                                                                 | 6%  | £-17,278,315                                | £-13,728,851 | £-10,179,386 | £-6,629,921  | £-3,080,456  | £469,008     | £4,018,473  | £7,567,938  | £11,117,403 | £14,666,867 | £18,216,332 |
|                                                                                 | 7%  | £-20,158,035                                | £-16,608,570 | £-13,059,105 | £-9,509,640  | £-5,960,176  | £-2,410,711  | £1,138,754  | £4,688,219  | £8,237,683  | £11,787,148 | £15,336,613 |
|                                                                                 | 8%  | £-23,037,754                                | £-19,488,289 | £-15,938,824 | £-12,389,360 | £-8,839,895  | £-5,290,430  | £-1,740,965 | £1,808,499  | £5,357,964  | £8,907,429  | £12,456,894 |
|                                                                                 | 9%  | £-25,917,473                                | £-22,368,008 | £-18,818,544 | £-15,269,079 | £-11,719,614 | £-8,170,149  | £-4,620,685 | £-1,071,220 | £2,478,245  | £6,027,710  | £9,577,174  |
|                                                                                 | 10% | £-28,797,192                                | £-25,247,728 | £-21,698,263 | £-18,148,798 | £-14,599,333 | £-11,049,869 | £-7,500,404 | £-3,950,939 | £-401,474   | £3,147,990  | £6,697,455  |

Figure S.104: Incremental total cost varying the effectiveness and cost of the intervention across England over five years; extreme risk; 100% implementation rate; non-decent homes (allergic rhinitis)



|                                                                                 |     | Upfront cost of intervention (per dwelling) |             |             |             |             |             |             |             |             |             |              |
|---------------------------------------------------------------------------------|-----|---------------------------------------------|-------------|-------------|-------------|-------------|-------------|-------------|-------------|-------------|-------------|--------------|
|                                                                                 |     | £0.00                                       | £25.00      | £50.00      | £75.00      | £100.00     | £125.00     | £150.00     | £175.00     | £200.00     | £225.00     | £250.00      |
| Relative reduction in allergic rhinitis associated symptoms due to intervention | 0%  | £0                                          | £10,679,134 | £21,358,268 | £32,037,402 | £42,716,536 | £53,395,670 | £64,074,804 | £74,753,938 | £85,433,072 | £96,112,206 | £106,791,340 |
|                                                                                 | 1%  | £8,664,097                                  | £2,015,037  | £12,694,171 | £23,373,305 | £34,052,439 | £44,731,573 | £55,410,707 | £66,089,841 | £76,768,975 | £87,448,109 | £98,127,243  |
|                                                                                 | 2%  | £17,328,194                                 | £6,649,060  | £4,030,074  | £14,709,208 | £25,388,342 | £36,067,476 | £46,746,609 | £57,425,743 | £68,104,877 | £78,784,011 | £89,463,145  |
|                                                                                 | 3%  | £25,992,291                                 | £15,313,158 | £4,634,024  | £6,045,110  | £16,724,244 | £27,403,378 | £38,082,512 | £48,761,646 | £59,440,780 | £70,119,914 | £80,799,048  |
|                                                                                 | 4%  | £34,656,389                                 | £23,977,255 | £13,298,121 | £2,618,987  | £8,060,147  | £18,739,281 | £29,418,415 | £40,097,549 | £50,776,683 | £61,455,817 | £72,134,951  |
|                                                                                 | 5%  | £43,320,486                                 | £32,641,352 | £21,962,218 | £11,283,084 | £603,950    | £10,075,184 | £20,754,318 | £31,433,452 | £42,112,586 | £52,791,720 | £63,470,854  |
|                                                                                 | 6%  | £51,984,583                                 | £41,305,449 | £30,626,315 | £19,947,181 | £9,268,047  | £1,411,087  | £12,090,221 | £22,769,355 | £33,448,489 | £44,127,623 | £54,806,757  |
|                                                                                 | 7%  | £60,648,680                                 | £49,969,546 | £39,290,412 | £28,611,278 | £17,932,144 | £7,253,010  | £3,426,124  | £14,105,258 | £24,784,392 | £35,463,526 | £46,142,660  |
|                                                                                 | 8%  | £69,312,777                                 | £58,633,643 | £47,954,509 | £37,275,375 | £26,596,241 | £15,917,107 | £5,237,973  | £5,441,160  | £16,120,294 | £26,799,428 | £37,478,562  |
|                                                                                 | 9%  | £77,976,874                                 | £67,297,740 | £56,618,606 | £45,939,473 | £35,260,339 | £24,581,205 | £13,902,071 | £3,222,937  | £7,456,197  | £18,135,331 | £28,814,465  |
|                                                                                 | 10% | £86,640,972                                 | £75,961,838 | £65,282,704 | £54,603,570 | £43,924,436 | £33,245,302 | £22,566,168 | £11,887,034 | £1,207,900  | £9,471,234  | £20,150,368  |

Figure S.11: Incremental total cost varying the effectiveness and cost of the intervention across England over five years; extreme risk; 100% implementation rate; usable floor area <90m<sup>2</sup> (allergic rhinitis)

|                                                                                 |     | Upfront cost of intervention (per dwelling) |            |            |            |            |            |            |            |            |            |            |
|---------------------------------------------------------------------------------|-----|---------------------------------------------|------------|------------|------------|------------|------------|------------|------------|------------|------------|------------|
|                                                                                 |     | £0.00                                       | £25.00     | £50.00     | £75.00     | £100.00    | £125.00    | £150.00    | £175.00    | £200.00    | £225.00    | £250.00    |
| Relative reduction in allergic rhinitis associated symptoms due to intervention | 0%  | £0                                          | £743,217   | £1,486,434 | £2,229,651 | £2,972,869 | £3,716,086 | £4,459,303 | £5,202,520 | £5,945,737 | £6,688,954 | £7,432,171 |
|                                                                                 | 1%  | £602,980                                    | £140,237   | £883,454   | £1,626,671 | £2,369,888 | £3,113,106 | £3,856,323 | £4,599,540 | £5,342,757 | £6,085,974 | £6,829,191 |
|                                                                                 | 2%  | £1,205,960                                  | £462,743   | £280,474   | £1,023,691 | £1,766,908 | £2,510,125 | £3,253,343 | £3,996,560 | £4,739,777 | £5,482,994 | £6,226,211 |
|                                                                                 | 3%  | £1,808,940                                  | £1,065,723 | £322,506   | £420,711   | £1,163,928 | £1,907,145 | £2,650,362 | £3,393,580 | £4,136,797 | £4,880,014 | £5,623,231 |
|                                                                                 | 4%  | £2,411,920                                  | £1,668,703 | £925,486   | £182,269   | £560,948   | £1,304,165 | £2,047,382 | £2,790,599 | £3,533,817 | £4,277,034 | £5,020,251 |
|                                                                                 | 5%  | £3,014,901                                  | £2,271,683 | £1,528,466 | £785,249   | £42,032    | £701,185   | £1,444,402 | £2,187,619 | £2,930,836 | £3,674,054 | £4,417,271 |
|                                                                                 | 6%  | £3,617,881                                  | £2,874,664 | £2,131,446 | £1,388,229 | £645,012   | £98,205    | £841,422   | £1,584,639 | £2,327,856 | £3,071,073 | £3,814,291 |
|                                                                                 | 7%  | £4,220,861                                  | £3,477,644 | £2,734,427 | £1,991,209 | £1,247,992 | £504,775   | £238,442   | £981,659   | £1,724,876 | £2,468,093 | £3,211,311 |
|                                                                                 | 8%  | £4,823,841                                  | £4,080,624 | £3,337,407 | £2,594,190 | £1,850,972 | £1,107,755 | £364,538   | £378,679   | £1,121,896 | £1,865,113 | £2,608,330 |
|                                                                                 | 9%  | £5,426,821                                  | £4,683,604 | £3,940,387 | £3,197,170 | £2,453,953 | £1,710,735 | £967,518   | £224,301   | £518,916   | £1,262,133 | £2,005,350 |
|                                                                                 | 10% | £6,029,801                                  | £5,286,584 | £4,543,367 | £3,800,150 | £3,056,933 | £2,313,715 | £1,570,498 | £827,281   | £84,064    | £659,153   | £1,402,370 |

Figure S.12: Incremental total cost varying the effectiveness and cost of the intervention across England over five years; extreme risk; 100% implementation rate; any damp problem (allergic rhinitis)

|                                                                                 |     | Upfront cost of intervention (per dwelling) |             |             |             |              |              |              |              |              |              |              |
|---------------------------------------------------------------------------------|-----|---------------------------------------------|-------------|-------------|-------------|--------------|--------------|--------------|--------------|--------------|--------------|--------------|
|                                                                                 |     | £0.00                                       | £25.00      | £50.00      | £75.00      | £100.00      | £125.00      | £150.00      | £175.00      | £200.00      | £225.00      | £250.00      |
| Relative reduction in allergic rhinitis associated symptoms due to intervention | 0%  | £0                                          | £29,578,873 | £59,157,746 | £88,736,619 | £118,315,492 | £147,894,365 | £177,473,238 | £207,052,111 | £236,630,984 | £266,209,857 | £295,788,730 |
|                                                                                 | 1%  | £7,406,685                                  | £22,172,188 | £51,751,061 | £81,329,934 | £110,908,807 | £140,487,680 | £170,066,553 | £199,645,426 | £229,224,299 | £258,803,171 | £288,382,044 |
|                                                                                 | 2%  | £14,813,371                                 | £14,765,502 | £44,344,375 | £73,923,248 | £103,502,121 | £133,080,994 | £162,659,867 | £192,238,740 | £221,817,613 | £251,396,486 | £280,975,359 |
|                                                                                 | 3%  | £22,220,056                                 | £7,358,817  | £36,937,690 | £66,516,563 | £96,095,436  | £125,674,309 | £155,253,182 | £184,832,055 | £214,410,928 | £243,989,801 | £273,568,674 |
|                                                                                 | 4%  | £29,626,741                                 | £47,868     | £29,531,005 | £59,109,878 | £88,688,751  | £118,267,624 | £147,846,497 | £177,425,370 | £207,004,243 | £236,583,116 | £266,161,989 |
|                                                                                 | 5%  | £37,033,426                                 | £7,454,553  | £22,124,320 | £51,703,193 | £81,282,065  | £110,860,938 | £140,439,811 | £170,018,684 | £199,597,557 | £229,176,430 | £258,755,303 |
|                                                                                 | 6%  | £44,440,112                                 | £14,861,239 | £14,717,634 | £44,296,507 | £73,875,380  | £103,454,253 | £133,033,126 | £162,611,999 | £192,190,872 | £221,769,745 | £251,348,618 |
|                                                                                 | 7%  | £51,846,797                                 | £22,267,924 | £7,310,949  | £36,889,822 | £66,468,695  | £96,047,568  | £125,626,441 | £155,205,314 | £184,784,187 | £214,363,060 | £243,941,933 |
|                                                                                 | 8%  | £59,253,482                                 | £29,674,609 | £95,736     | £29,483,137 | £59,062,010  | £88,640,883  | £118,219,756 | £147,798,629 | £177,377,502 | £206,956,375 | £236,535,248 |
|                                                                                 | 9%  | £66,660,168                                 | £37,081,295 | £7,502,422  | £22,076,451 | £51,655,324  | £81,234,197  | £110,813,070 | £140,391,943 | £169,970,816 | £199,549,689 | £229,128,562 |
|                                                                                 | 10% | £74,066,853                                 | £44,487,980 | £14,909,107 | £14,669,766 | £44,248,639  | £73,827,512  | £103,406,385 | £132,985,258 | £162,564,131 | £192,143,004 | £221,721,877 |

Figure S.13: Incremental total cost varying the effectiveness and cost of the intervention across England over five years; low risk; 50% implementation rate; non-decent homes (allergic rhinitis)

|                                                                                 |     | Upfront cost of intervention (per dwelling) |              |              |              |              |              |              |              |              |              |              |
|---------------------------------------------------------------------------------|-----|---------------------------------------------|--------------|--------------|--------------|--------------|--------------|--------------|--------------|--------------|--------------|--------------|
|                                                                                 |     | £0.00                                       | £25.00       | £50.00       | £75.00       | £100.00      | £125.00      | £150.00      | £175.00      | £200.00      | £225.00      | £250.00      |
| Relative reduction in allergic rhinitis associated symptoms due to intervention | 0%  | £0                                          | £88,992,783  | £177,985,566 | £266,978,349 | £355,971,132 | £444,963,915 | £533,956,698 | £622,949,481 | £711,942,264 | £800,935,047 | £889,927,831 |
|                                                                                 | 1%  | £22,284,201                                 | £66,708,583  | £155,701,366 | £244,694,149 | £333,686,932 | £422,679,715 | £511,672,498 | £600,665,281 | £689,658,064 | £778,650,847 | £867,643,630 |
|                                                                                 | 2%  | £44,568,401                                 | £44,424,382  | £133,417,165 | £222,409,948 | £311,402,731 | £400,395,514 | £489,388,297 | £578,381,080 | £667,373,863 | £756,366,646 | £845,359,430 |
|                                                                                 | 3%  | £66,852,602                                 | £22,140,182  | £111,132,965 | £200,125,748 | £289,118,531 | £378,111,314 | £467,104,097 | £556,096,880 | £645,089,663 | £734,082,446 | £823,075,229 |
|                                                                                 | 4%  | £89,136,802                                 | £144,019     | £88,848,764  | £177,841,547 | £266,834,330 | £355,827,113 | £444,819,896 | £533,812,679 | £622,805,462 | £711,798,245 | £800,791,028 |
|                                                                                 | 5%  | £111,421,003                                | £22,428,219  | £66,564,564  | £155,557,347 | £244,550,130 | £333,542,913 | £422,535,696 | £511,528,479 | £600,521,262 | £689,514,045 | £778,506,828 |
|                                                                                 | 6%  | £133,705,203                                | £44,712,420  | £44,280,363  | £133,273,146 | £222,265,929 | £311,258,712 | £400,251,495 | £489,244,278 | £578,237,061 | £667,229,844 | £756,222,627 |
|                                                                                 | 7%  | £155,989,404                                | £66,996,621  | £21,996,163  | £110,988,946 | £199,981,729 | £288,974,512 | £377,967,295 | £466,960,078 | £555,952,861 | £644,945,644 | £733,938,427 |
|                                                                                 | 8%  | £178,273,604                                | £89,280,821  | £288,038     | £88,704,745  | £177,697,528 | £266,690,311 | £355,683,094 | £444,675,877 | £533,668,660 | £622,661,443 | £711,654,226 |
|                                                                                 | 9%  | £200,557,805                                | £111,565,022 | £22,572,238  | £66,420,545  | £155,413,328 | £244,406,111 | £333,398,894 | £422,391,677 | £511,384,460 | £600,377,243 | £689,370,026 |
|                                                                                 | 10% | £222,842,005                                | £133,849,222 | £44,856,439  | £44,136,344  | £133,129,127 | £222,121,910 | £311,114,693 | £400,107,476 | £489,100,259 | £578,093,042 | £667,085,825 |

Figure S.14: Incremental total cost varying the effectiveness and cost of the intervention across England over five years; low risk; 50% implementation rate; usable floor area <90m<sup>2</sup> (allergic rhinitis)



|                                                                                 |     | Upfront cost of intervention (per dwelling) |            |             |             |             |             |             |             |             |             |             |
|---------------------------------------------------------------------------------|-----|---------------------------------------------|------------|-------------|-------------|-------------|-------------|-------------|-------------|-------------|-------------|-------------|
|                                                                                 |     | £0.00                                       | £25.00     | £50.00      | £75.00      | £100.00     | £125.00     | £150.00     | £175.00     | £200.00     | £225.00     | £250.00     |
| Relative reduction in allergic rhinitis associated symptoms due to intervention | 0%  | £0                                          | £6,193,476 | £12,386,952 | £18,580,428 | £24,773,904 | £30,967,380 | £37,160,857 | £43,354,333 | £49,547,809 | £55,741,285 | £61,934,761 |
|                                                                                 | 1%  | £1,550,875                                  | £4,642,601 | £10,836,077 | £17,029,553 | £23,223,030 | £29,416,506 | £35,609,982 | £41,803,458 | £47,996,934 | £54,190,410 | £60,383,886 |
|                                                                                 | 2%  | £3,101,750                                  | £3,091,727 | £9,285,203  | £15,478,679 | £21,672,155 | £27,865,631 | £34,059,107 | £40,252,583 | £46,446,059 | £52,639,535 | £58,833,011 |
|                                                                                 | 3%  | £4,652,624                                  | £1,540,852 | £7,734,328  | £13,927,804 | £20,121,280 | £26,314,756 | £32,508,232 | £38,701,708 | £44,895,184 | £51,088,660 | £57,282,137 |
|                                                                                 | 4%  | £6,203,499                                  | £10,023    | £6,183,453  | £12,376,929 | £18,570,405 | £24,763,881 | £30,957,357 | £37,150,834 | £43,344,310 | £49,537,786 | £55,731,262 |
|                                                                                 | 5%  | £7,754,374                                  | £1,560,898 | £4,632,578  | £10,826,054 | £17,019,530 | £23,213,007 | £29,406,483 | £35,599,959 | £41,793,435 | £47,986,911 | £54,180,387 |
|                                                                                 | 6%  | £9,305,249                                  | £3,111,773 | £3,081,703  | £9,275,180  | £15,468,656 | £21,662,132 | £27,855,608 | £34,049,084 | £40,242,560 | £46,436,036 | £52,629,512 |
|                                                                                 | 7%  | £10,856,123                                 | £4,662,647 | £1,530,829  | £7,724,305  | £13,917,781 | £20,111,257 | £26,304,733 | £32,498,209 | £38,691,685 | £44,885,161 | £51,078,637 |
|                                                                                 | 8%  | £12,406,998                                 | £6,213,522 | £20,046     | £6,173,430  | £12,366,906 | £18,560,382 | £24,753,858 | £30,947,334 | £37,140,810 | £43,334,287 | £49,527,763 |
|                                                                                 | 9%  | £13,957,873                                 | £7,764,397 | £1,570,921  | £4,622,555  | £10,816,031 | £17,009,507 | £23,202,983 | £29,396,460 | £35,589,936 | £41,783,412 | £47,976,888 |
|                                                                                 | 10% | £15,508,748                                 | £9,315,272 | £3,121,796  | £3,071,680  | £9,265,157  | £15,458,633 | £21,652,109 | £27,845,585 | £34,039,061 | £40,232,537 | £46,426,013 |

Figure S.155: Incremental total cost varying the effectiveness and cost of the intervention across England over five years; low risk; 50% implementation rate; any damp problems (allergic rhinitis)

## GAD

|                                                                                            |     | Upfront cost of intervention (per dwelling) |             |             |             |             |             |             |             |             |             |             |
|--------------------------------------------------------------------------------------------|-----|---------------------------------------------|-------------|-------------|-------------|-------------|-------------|-------------|-------------|-------------|-------------|-------------|
|                                                                                            |     | £0.00                                       | £25.00      | £50.00      | £75.00      | £100.00     | £125.00     | £150.00     | £175.00     | £200.00     | £225.00     | £250.00     |
| Relative reduction in generalised anxiety disorder associated symptoms due to intervention | 0%  | £0                                          | £3,549,465  | £7,098,930  | £10,648,394 | £14,197,859 | £17,747,324 | £21,296,789 | £24,846,253 | £28,395,718 | £31,945,183 | £35,494,648 |
|                                                                                            | 1%  | £3,095,719                                  | £453,745    | £4,003,210  | £7,552,675  | £11,102,140 | £14,651,604 | £18,201,069 | £21,750,534 | £25,299,999 | £28,849,463 | £32,398,928 |
|                                                                                            | 2%  | £6,191,439                                  | £2,641,974  | £907,491    | £4,456,955  | £8,006,420  | £11,555,885 | £15,105,350 | £18,654,814 | £22,204,279 | £25,753,744 | £29,303,209 |
|                                                                                            | 3%  | £9,287,158                                  | £5,737,694  | £2,188,229  | £1,361,236  | £4,910,701  | £8,460,165  | £12,009,630 | £15,559,095 | £19,108,560 | £22,658,024 | £26,207,489 |
|                                                                                            | 4%  | £12,382,878                                 | £8,833,413  | £5,283,948  | £1,734,484  | £1,814,981  | £5,364,446  | £8,913,911  | £12,463,375 | £16,012,840 | £19,562,305 | £23,111,770 |
|                                                                                            | 5%  | £15,478,597                                 | £11,929,133 | £8,379,668  | £4,830,203  | £1,280,738  | £2,268,726  | £5,818,191  | £9,367,656  | £12,917,121 | £16,466,585 | £20,016,050 |
|                                                                                            | 6%  | £18,574,317                                 | £15,024,852 | £11,475,387 | £7,925,923  | £4,376,458  | £826,993    | £2,722,472  | £6,271,937  | £9,821,401  | £13,370,866 | £16,920,331 |
|                                                                                            | 7%  | £21,670,036                                 | £18,120,571 | £14,571,107 | £11,021,642 | £7,472,177  | £3,922,712  | £373,248    | £3,176,217  | £6,725,682  | £10,275,147 | £13,824,611 |
|                                                                                            | 8%  | £24,765,756                                 | £21,216,291 | £17,666,826 | £14,117,361 | £10,567,897 | £7,018,432  | £3,468,967  | £80,498     | £3,629,962  | £7,179,427  | £10,728,892 |
|                                                                                            | 9%  | £27,861,475                                 | £24,312,010 | £20,762,546 | £17,213,081 | £13,663,616 | £10,114,151 | £6,564,687  | £3,015,222  | £534,243    | £4,083,708  | £7,633,172  |
|                                                                                            | 10% | £30,957,195                                 | £27,407,730 | £23,858,265 | £20,308,800 | £16,759,336 | £13,209,871 | £9,660,406  | £6,110,941  | £2,561,477  | £987,988    | £4,537,453  |

Figure S.16: Incremental total cost varying the effectiveness and cost of the intervention across England over five years; extreme risk; 100% implementation rate; non-decent homes (GAD)



|                                                                                            |     | Upfront cost of intervention (per dwelling) |              |              |              |              |              |              |              |             |             |              |
|--------------------------------------------------------------------------------------------|-----|---------------------------------------------|--------------|--------------|--------------|--------------|--------------|--------------|--------------|-------------|-------------|--------------|
|                                                                                            |     | £0.00                                       | £25.00       | £50.00       | £75.00       | £100.00      | £125.00      | £150.00      | £175.00      | £200.00     | £225.00     | £250.00      |
| Relative reduction in generalised anxiety disorder associated symptoms due to intervention | 0%  | £0                                          | £10,679,134  | £21,358,268  | £32,037,402  | £42,716,536  | £53,395,670  | £64,074,804  | £74,753,938  | £85,433,072 | £96,112,206 | £106,791,340 |
|                                                                                            | 1%  | £-9,313,968                                 | £1,365,165   | £12,044,299  | £22,723,433  | £33,402,567  | £44,081,701  | £54,760,835  | £65,439,969  | £76,119,103 | £86,798,237 | £97,477,371  |
|                                                                                            | 2%  | £-18,627,937                                | £-7,948,803  | £2,730,331   | £13,409,465  | £24,088,599  | £34,767,733  | £45,446,867  | £56,126,001  | £66,805,135 | £77,484,269 | £88,163,403  |
|                                                                                            | 3%  | £-27,941,905                                | £-17,262,771 | £-6,583,638  | £4,095,496   | £14,774,630  | £25,453,764  | £36,132,898  | £46,812,032  | £57,491,166 | £68,170,300 | £78,849,434  |
|                                                                                            | 4%  | £-37,255,874                                | £-26,576,740 | £-15,897,606 | £-5,218,472  | £5,460,662   | £16,139,796  | £26,818,930  | £37,498,064  | £48,177,198 | £58,856,332 | £69,535,466  |
|                                                                                            | 5%  | £-46,569,842                                | £-35,890,708 | £-25,211,574 | £-14,532,441 | £-3,853,307  | £6,825,827   | £17,504,961  | £28,184,095  | £38,863,229 | £49,542,363 | £60,221,497  |
|                                                                                            | 6%  | £-55,883,811                                | £-45,204,677 | £-34,525,543 | £-23,846,409 | £-13,167,275 | £-2,488,141  | £8,190,993   | £18,870,127  | £29,549,261 | £40,228,395 | £50,907,529  |
|                                                                                            | 7%  | £-65,197,779                                | £-54,518,645 | £-43,839,511 | £-33,160,378 | £-22,481,244 | £-11,802,110 | £-1,122,976  | £9,556,158   | £20,235,292 | £30,914,426 | £41,593,560  |
|                                                                                            | 8%  | £-74,511,748                                | £-63,832,614 | £-53,153,480 | £-42,474,346 | £-31,795,212 | £-21,116,078 | £-10,436,944 | £242,190     | £10,921,324 | £21,600,458 | £32,279,592  |
|                                                                                            | 9%  | £-83,825,716                                | £-73,146,582 | £-62,467,448 | £-51,788,314 | £-41,109,181 | £-30,430,047 | £-19,750,913 | £-9,071,779  | £1,607,355  | £12,286,489 | £22,965,623  |
|                                                                                            | 10% | £-93,139,685                                | £-82,460,551 | £-71,781,417 | £-61,102,283 | £-50,423,149 | £-39,744,015 | £-29,064,881 | £-18,385,747 | £-7,706,613 | £2,972,521  | £13,651,655  |

Figure S.17: Incremental total cost varying the effectiveness and cost of the intervention across England over five years; extreme risk; 100% implementation rate; usable floor area <90m<sup>2</sup> (GAD)

|                                                                                            |     | Upfront cost of intervention (per dwelling) |             |             |             |             |             |             |             |            |            |            |
|--------------------------------------------------------------------------------------------|-----|---------------------------------------------|-------------|-------------|-------------|-------------|-------------|-------------|-------------|------------|------------|------------|
|                                                                                            |     | £0.00                                       | £25.00      | £50.00      | £75.00      | £100.00     | £125.00     | £150.00     | £175.00     | £200.00    | £225.00    | £250.00    |
| Relative reduction in generalised anxiety disorder associated symptoms due to intervention | 0%  | £0                                          | £743,217    | £1,486,434  | £2,229,651  | £2,972,869  | £3,716,086  | £4,459,303  | £5,202,520  | £5,945,737 | £6,688,954 | £7,432,171 |
|                                                                                            | 1%  | £-648,208                                   | £95,009     | £838,226    | £1,581,443  | £2,324,660  | £3,067,878  | £3,811,095  | £4,554,312  | £5,297,529 | £6,040,746 | £6,783,963 |
|                                                                                            | 2%  | £-1,296,416                                 | £-553,199   | £190,018    | £933,235    | £1,676,452  | £2,419,669  | £3,162,887  | £3,906,104  | £4,649,321 | £5,392,538 | £6,135,755 |
|                                                                                            | 3%  | £-1,944,624                                 | £-1,201,407 | £-458,190   | £285,027    | £1,028,244  | £1,771,461  | £2,514,679  | £3,257,896  | £4,001,113 | £4,744,330 | £5,487,547 |
|                                                                                            | 4%  | £-2,592,832                                 | £-1,849,615 | £-1,106,398 | £-363,181   | £380,036    | £1,123,253  | £1,866,470  | £2,609,688  | £3,352,905 | £4,096,122 | £4,839,339 |
|                                                                                            | 5%  | £-3,241,040                                 | £-2,497,823 | £-1,754,606 | £-1,011,389 | £-268,172   | £475,045    | £1,218,262  | £1,961,480  | £2,704,697 | £3,447,914 | £4,191,131 |
|                                                                                            | 6%  | £-3,889,248                                 | £-3,146,031 | £-2,402,814 | £-1,659,597 | £-916,380   | £-173,163   | £570,054    | £1,313,271  | £2,056,489 | £2,799,706 | £3,542,923 |
|                                                                                            | 7%  | £-4,537,457                                 | £-3,794,239 | £-3,051,022 | £-2,307,805 | £-1,564,588 | £-821,371   | £-78,154    | £665,063    | £1,408,280 | £2,151,498 | £2,894,715 |
|                                                                                            | 8%  | £-5,185,665                                 | £-4,442,448 | £-3,699,230 | £-2,956,013 | £-2,212,796 | £-1,469,579 | £-726,362   | £16,855     | £760,072   | £1,503,290 | £2,246,507 |
|                                                                                            | 9%  | £-5,833,873                                 | £-5,090,656 | £-4,347,438 | £-3,604,221 | £-2,861,004 | £-2,117,787 | £-1,374,570 | £-631,353   | £111,864   | £855,081   | £1,598,299 |
|                                                                                            | 10% | £-6,482,081                                 | £-5,738,864 | £-4,995,647 | £-4,252,429 | £-3,509,212 | £-2,765,995 | £-2,022,778 | £-1,279,561 | £-536,344  | £206,873   | £950,090   |

Figure S.18: Incremental total cost varying the effectiveness and cost of the intervention across England over five years; extreme risk; 100% implementation rate; any damp problem (GAD)

|                                                                                            |     | Upfront cost of intervention (per dwelling) |             |             |             |              |              |              |              |              |              |              |
|--------------------------------------------------------------------------------------------|-----|---------------------------------------------|-------------|-------------|-------------|--------------|--------------|--------------|--------------|--------------|--------------|--------------|
|                                                                                            |     | £0.00                                       | £25.00      | £50.00      | £75.00      | £100.00      | £125.00      | £150.00      | £175.00      | £200.00      | £225.00      | £250.00      |
| Relative reduction in generalised anxiety disorder associated symptoms due to intervention | 0%  | £0                                          | £29,578,873 | £59,157,746 | £88,736,619 | £118,315,492 | £147,894,365 | £177,473,238 | £207,052,111 | £236,630,984 | £266,209,857 | £295,788,730 |
|                                                                                            | 1%  | £7,962,241                                  | £21,616,632 | £51,195,505 | £80,774,378 | £110,353,250 | £139,932,123 | £169,510,996 | £199,089,869 | £228,668,742 | £258,247,615 | £287,826,488 |
|                                                                                            | 2%  | £15,924,483                                 | £13,654,390 | £43,233,263 | £72,812,136 | £102,391,009 | £131,969,882 | £161,548,755 | £191,127,628 | £220,706,501 | £250,285,374 | £279,864,247 |
|                                                                                            | 3%  | £23,886,724                                 | £5,692,149  | £35,271,022 | £64,849,895 | £94,428,768  | £124,007,641 | £153,586,514 | £183,165,387 | £212,744,260 | £242,323,133 | £271,902,005 |
|                                                                                            | 4%  | £31,848,966                                 | £2,270,093  | £27,308,780 | £56,887,653 | £86,466,526  | £116,045,399 | £145,624,272 | £175,203,145 | £204,782,018 | £234,360,891 | £263,939,764 |
|                                                                                            | 5%  | £39,811,207                                 | £10,232,334 | £19,346,539 | £48,925,412 | £78,504,285  | £108,083,158 | £137,662,031 | £167,240,904 | £196,819,777 | £226,398,650 | £255,977,523 |
|                                                                                            | 6%  | £47,773,449                                 | £18,194,576 | £11,384,297 | £40,963,170 | £70,542,043  | £100,120,916 | £129,699,789 | £159,278,662 | £188,857,535 | £218,436,408 | £248,015,281 |
|                                                                                            | 7%  | £55,735,690                                 | £26,156,817 | £3,422,056  | £33,000,929 | £62,579,802  | £92,158,675  | £121,737,548 | £151,316,421 | £180,895,294 | £210,474,167 | £240,053,040 |
|                                                                                            | 8%  | £63,697,931                                 | £34,119,058 | £4,540,185  | £25,038,688 | £54,617,561  | £84,196,433  | £113,775,306 | £143,354,179 | £172,933,052 | £202,511,925 | £232,090,798 |
|                                                                                            | 9%  | £71,660,173                                 | £42,081,300 | £12,502,427 | £17,076,446 | £46,655,319  | £76,234,192  | £105,813,065 | £135,391,938 | £164,970,811 | £194,549,684 | £224,128,557 |
|                                                                                            | 10% | £79,622,414                                 | £50,043,541 | £20,464,668 | £9,114,205  | £38,693,078  | £68,271,951  | £97,850,824  | £127,429,697 | £157,008,570 | £186,587,443 | £216,166,316 |

Figure S.19: Incremental total cost varying the effectiveness and cost of the intervention across England over five years; low risk; 50% implementation rate; non-decent homes (GAD)

|                                                                                            |     | Upfront cost of intervention (per dwelling) |              |              |              |              |              |              |              |              |              |              |
|--------------------------------------------------------------------------------------------|-----|---------------------------------------------|--------------|--------------|--------------|--------------|--------------|--------------|--------------|--------------|--------------|--------------|
|                                                                                            |     | £0.00                                       | £25.00       | £50.00       | £75.00       | £100.00      | £125.00      | £150.00      | £175.00      | £200.00      | £225.00      | £250.00      |
| Relative reduction in generalised anxiety disorder associated symptoms due to intervention | 0%  | £0                                          | £88,992,783  | £177,985,566 | £266,978,349 | £355,971,132 | £444,963,915 | £533,956,698 | £622,949,481 | £711,942,264 | £800,935,047 | £889,927,831 |
|                                                                                            | 1%  | £23,955,680                                 | £65,037,103  | £154,029,886 | £243,022,669 | £332,015,452 | £421,008,235 | £510,001,018 | £598,993,801 | £687,986,584 | £776,979,367 | £865,972,150 |
|                                                                                            | 2%  | £47,911,361                                 | £41,081,423  | £130,074,206 | £219,066,989 | £308,059,772 | £397,052,555 | £486,045,338 | £575,038,121 | £664,030,904 | £753,023,687 | £842,016,470 |
|                                                                                            | 3%  | £71,867,041                                 | £17,125,742  | £106,118,525 | £195,111,308 | £284,104,091 | £373,096,874 | £462,089,658 | £551,082,441 | £640,075,224 | £729,068,007 | £818,060,790 |
|                                                                                            | 4%  | £95,822,721                                 | £6,829,938   | £82,162,845  | £171,155,628 | £260,148,411 | £349,141,194 | £438,133,977 | £527,126,760 | £616,119,543 | £705,112,326 | £794,105,109 |
|                                                                                            | 5%  | £119,778,401                                | £30,785,618  | £58,207,165  | £147,199,948 | £236,192,731 | £325,185,514 | £414,178,297 | £503,171,080 | £592,163,863 | £681,156,646 | £770,149,429 |
|                                                                                            | 6%  | £143,734,082                                | £54,741,299  | £34,251,485  | £123,244,268 | £212,237,051 | £301,229,834 | £390,222,617 | £479,215,400 | £568,208,183 | £657,200,966 | £746,193,749 |
|                                                                                            | 7%  | £167,689,762                                | £78,696,979  | £10,295,804  | £99,288,587  | £188,281,370 | £277,274,153 | £366,266,936 | £455,259,720 | £544,252,503 | £633,245,286 | £722,238,069 |
|                                                                                            | 8%  | £191,645,442                                | £102,652,659 | £13,659,876  | £75,332,907  | £164,325,690 | £253,318,473 | £342,311,256 | £431,304,039 | £520,296,822 | £609,289,605 | £698,282,388 |
|                                                                                            | 9%  | £215,601,122                                | £126,608,339 | £37,615,556  | £51,377,227  | £140,370,010 | £229,362,793 | £318,355,576 | £407,348,359 | £496,341,142 | £585,333,925 | £674,326,708 |
|                                                                                            | 10% | £239,556,803                                | £150,564,020 | £61,571,237  | £27,421,547  | £116,414,330 | £205,407,113 | £294,399,896 | £383,392,679 | £472,385,462 | £561,378,245 | £650,371,028 |

Figure S.20: Incremental total cost varying the effectiveness and cost of the intervention across England over five years; low risk; 50% implementation rate; usable floor area <90m<sup>2</sup> (GAD)

|                                                                                            |     | Upfront cost of intervention (per dwelling) |             |             |             |             |             |             |             |             |             |             |
|--------------------------------------------------------------------------------------------|-----|---------------------------------------------|-------------|-------------|-------------|-------------|-------------|-------------|-------------|-------------|-------------|-------------|
|                                                                                            |     | £0.00                                       | £25.00      | £50.00      | £75.00      | £100.00     | £125.00     | £150.00     | £175.00     | £200.00     | £225.00     | £250.00     |
| Relative reduction in generalised anxiety disorder associated symptoms due to intervention | 0%  | £0                                          | £6,193,476  | £12,386,952 | £18,580,428 | £24,773,904 | £30,967,380 | £37,160,857 | £43,354,333 | £49,547,809 | £55,741,285 | £61,934,761 |
|                                                                                            | 1%  | £1,667,202                                  | £4,526,274  | £10,719,750 | £16,913,226 | £23,106,703 | £29,300,179 | £35,493,655 | £41,687,131 | £47,880,607 | £54,074,083 | £60,267,559 |
|                                                                                            | 2%  | £3,334,404                                  | £2,859,072  | £9,052,548  | £15,246,025 | £21,439,501 | £27,632,977 | £33,826,453 | £40,019,929 | £46,213,405 | £52,406,881 | £58,600,357 |
|                                                                                            | 3%  | £5,001,606                                  | £1,191,871  | £7,385,347  | £13,578,823 | £19,772,299 | £25,965,775 | £32,159,251 | £38,352,727 | £44,546,203 | £50,739,679 | £56,933,155 |
|                                                                                            | 4%  | £6,668,807                                  | £475,331    | £5,718,145  | £11,911,621 | £18,105,097 | £24,298,573 | £30,492,049 | £36,685,525 | £42,879,001 | £49,072,477 | £55,265,953 |
|                                                                                            | 5%  | £8,336,009                                  | £2,142,533  | £4,050,943  | £10,244,419 | £16,437,895 | £22,631,371 | £28,824,847 | £35,018,323 | £41,211,799 | £47,405,276 | £53,598,752 |
|                                                                                            | 6%  | £10,003,211                                 | £3,809,735  | £2,383,741  | £8,577,217  | £14,770,693 | £20,964,169 | £27,157,645 | £33,351,122 | £39,544,598 | £45,738,074 | £51,931,550 |
|                                                                                            | 7%  | £11,670,413                                 | £5,476,937  | £716,539    | £6,910,015  | £13,103,491 | £19,296,967 | £25,490,444 | £31,683,920 | £37,877,396 | £44,070,872 | £50,264,348 |
|                                                                                            | 8%  | £13,337,615                                 | £7,144,139  | £950,663    | £5,242,813  | £11,436,290 | £17,629,766 | £23,823,242 | £30,016,718 | £36,210,194 | £42,403,670 | £48,597,146 |
|                                                                                            | 9%  | £15,004,817                                 | £8,811,341  | £2,617,865  | £3,575,612  | £9,769,088  | £15,962,564 | £22,156,040 | £28,349,516 | £34,542,992 | £40,736,468 | £46,929,944 |
|                                                                                            | 10% | £16,672,019                                 | £10,478,542 | £4,285,066  | £1,908,410  | £8,101,886  | £14,295,362 | £20,488,838 | £26,682,314 | £32,875,790 | £39,069,266 | £45,262,742 |

Figure S.216: Incremental total cost varying the effectiveness and cost of the intervention across England over five years; low risk; 50% implementation rate; any damp problem (GAD)
